# Supplementary material for: Pexidartinib Long‐Term Hepatic Safety Profile in Patients with Tenosynovial Giant Cell Tumors
Source: PubMed Central journal article supplement — Oncologist. 2020 Dec 24;26(5):e863–73. doi: 10.1002/onco.13629 (PMC8100574; doi:10.1002/onco.13629), 2020-12-24
Supplement: ONCO-26-e863-s001.pdf [file ONCO-26-e863-s001.pdf]

Supplemental Figures for  
Pexidartinib long-term hepatic safety profile in TGCT patients  
James Lewis et al.

Figure S1. Clinical laboratory reports of non-TGCT irreversible serious hepatic adverse reaction cases. A. Case #1;  
B. Case #2

A.

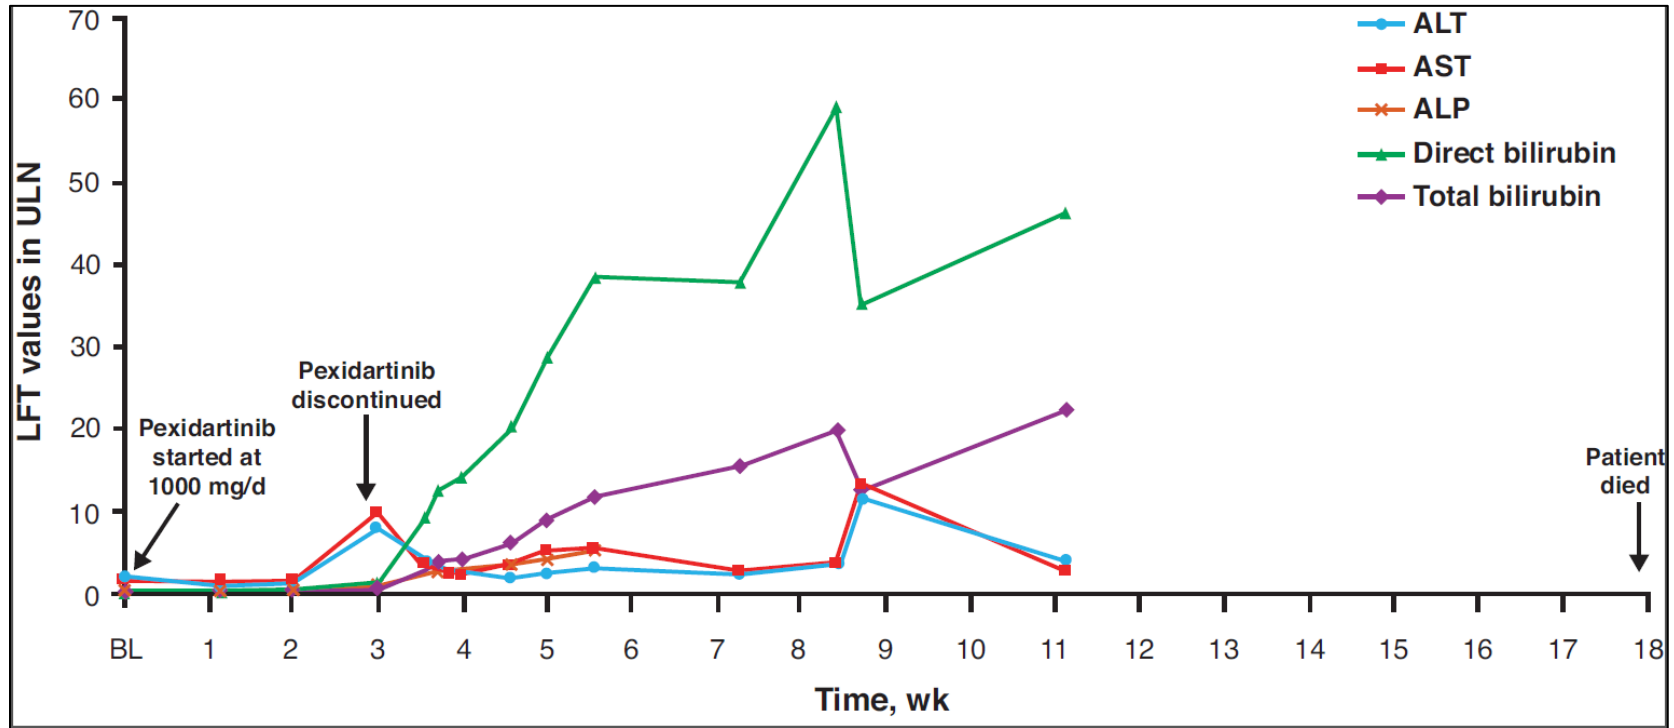

Supplemental Figures for  
Pexidartinib long-term hepatic safety profile in TGCT patients  
James Lewis et al.

B.

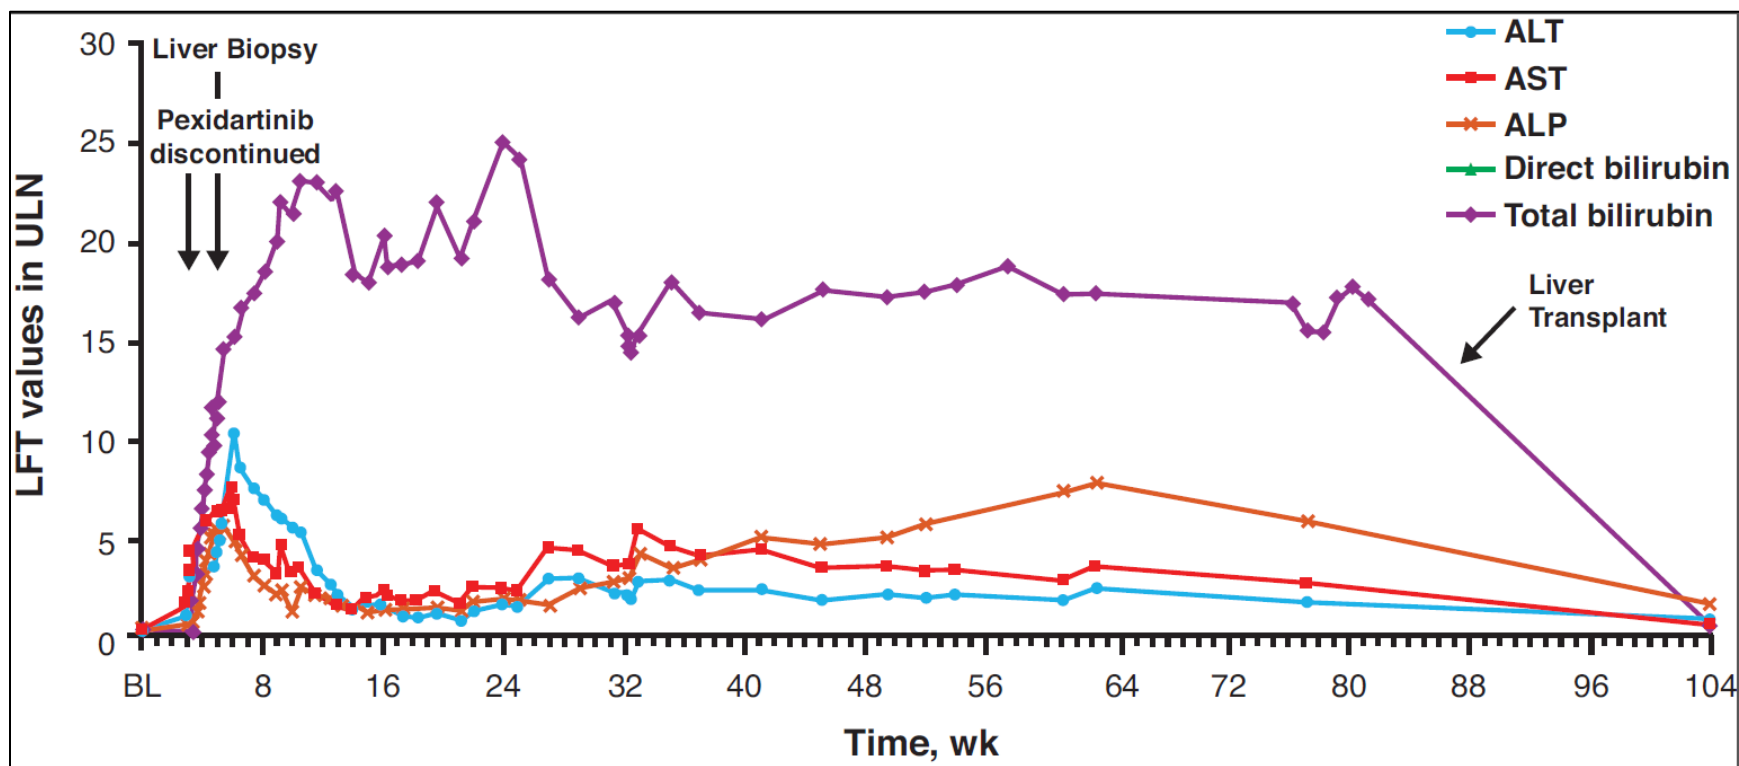

Abbreviations: ALP, alkaline phosphatase; ALT, alanine aminotransferase; AST, aspartate aminotransferase; BID, twice daily; d, day; LFT, liver function test; TGCT, tenosynovial giant cell tumor; ULN, upper limit of normal.
