# Supplementary material for: Pexidartinib Long‐Term Hepatic Safety Profile in Patients with Tenosynovial Giant Cell Tumors
Source: PubMed Central journal article supplement — Oncologist. 2020 Dec 24;26(5):e863–73. doi: 10.1002/onco.13629 (PMC8100574; doi:10.1002/onco.13629), 2020-12-24
Supplement: ONCO-26-e863-s002.pdf [file ONCO-26-e863-s002.pdf]

Supplemental Tables for:  
Pexidartinib long-term hepatic safety profile in TGCT patients  
James Lewis et al.

**Table S1.** Summary of non-TGCT studies of pexidartinib

| <b>Study</b>                                                                   | <b>No. of Patients</b>       | <b>Population</b>            |
|--------------------------------------------------------------------------------|------------------------------|------------------------------|
| <b>Safety Data From Studies of Pexidartinib Monotherapy in Cancer Subjects</b> |                              |                              |
| PLX108-01 (non-TGCT cohort)                                                    | 93                           | Non-TGCT solid tumor         |
| PLX108-03                                                                      | 20                           | Hodgkin's lymphoma           |
| PLX108-04                                                                      | 38                           | Glioblastoma multiforme      |
| PLX108-05                                                                      | 90                           | AML                          |
| PLX108-06                                                                      | 6                            | Prostate cancer              |
| PLX108-13                                                                      | 6                            | KIT-mutant melanoma          |
| PL3397-A-A103                                                                  | 11                           | Solid tumors, 1 TGCT subject |
| <b>Safety Data From Combination Therapy Studies</b>                            |                              |                              |
| PLX108-07 (+ paclitaxel)                                                       | 74<br>(68 with pexidartinib) | Solid tumors                 |
| PLX108-08 (+ temozolomide, radiotherapy)                                       | 65                           | Glioblastoma multiforme      |
| PLX108-09 (+ vemurafenib)                                                      | 13                           | BRAF mutant melanoma         |
| PLX108-14 (+ pembrolizumab)                                                    | 78                           | Solid tumors                 |
| PLX121-01 (+ PLX9486)                                                          | 12                           | Solid tumors                 |
| <b>Other Pexidartinib Studies</b>                                              |                              |                              |
| Investigator-initiated studies (8 studies)                                     | 138                          | Solid and hematologic tumors |

Abbreviations: AML, acute myeloid leukemia; BRAF, murine sarcoma viral oncogene homolog B; KIT, proto-oncogene receptor tyrosine kinase; TGCT, tenosynovial giant cell tumor.

**Table S2.** Hepatic laboratory abnormalities ( $\geq 10\%$  All Grades 1, 2,  $\geq 3$ ) in patients receiving pexidartinib

| Laboratory Abnormality <sup>b</sup> | ENLIVEN Randomized (1000 mg/d)<br>n = 61 |             |                    | ENLIVEN Crossover (800 mg/d) <sup>a</sup><br>n = 30 |             |                    | PLX108-01 TGCT Cohort (1000 mg/d) <sup>a</sup><br>n = 39 |             |                    | Other Phase 1 (600 or 800 mg/d) <sup>a</sup><br>n = 10 |             |                    | Pooled N = 140 |             |                    |
|-------------------------------------|------------------------------------------|-------------|--------------------|-----------------------------------------------------|-------------|--------------------|----------------------------------------------------------|-------------|--------------------|--------------------------------------------------------|-------------|--------------------|----------------|-------------|--------------------|
|                                     | Grade 1 (%)                              | Grade 2 (%) | Grade $\geq 3$ (%) | Grade 1 (%)                                         | Grade 2 (%) | Grade $\geq 3$ (%) | Grade 1 (%)                                              | Grade 2 (%) | Grade $\geq 3$ (%) | Grade 1 (%)                                            | Grade 2 (%) | Grade $\geq 3$ (%) | Grade 1 (%)    | Grade 2 (%) | Grade $\geq 3$ (%) |
| Increased GGT <sup>c</sup>          | N/A                                      | N/A         | N/A                | N/A                                                 | N/A         | N/A                | N/A                                                      | N/A         | N/A                | 0                                                      | 11          | 11                 | N/A            | N/A         | N/A                |
| Decreased albumin                   | 0                                        | 3           | 0                  | 0                                                   | 0           | 0                  | 13                                                       | 3           | 0                  | 10                                                     | 0           | 0                  | 4              | 2           | 0                  |
| Increased PTT <sup>d</sup>          | 14                                       | 0           | 0                  | 7                                                   | 0           | 0                  | N/A                                                      | N/A         | N/A                | 0                                                      | 0           | 0                  | 13             | 0           | 0                  |
| Increased INR <sup>e</sup>          | 10                                       | 0           | 0                  | 14                                                  | 0           | 0                  | N/A                                                      | N/A         | N/A                | 0                                                      | 0           | 0                  | 11             | 0           | 0                  |

<sup>a</sup>Pexidartinib starting dose.

<sup>b</sup>Graded per NCI CTCAE v. 4.03

<sup>c</sup>Routinely collected only in study 'PL3397-A-U126'. The number of patients who have  $\geq 1$  post-baseline value = 9.

<sup>d</sup>Not collected in study 'PLX108-01'. The number of subjects who have  $\geq 1$  baseline and post-baseline value = 65.

<sup>e</sup>Not collected in study 'PLX108-01'. The number of subjects who have  $\geq 1$  baseline and post-baseline value = 64.

Abbreviations: GGT, gamma-glutamyl transferase; INR, international normalized ratio; N/A, not applicable; NCI CTCAE, National Cancer Institute Common Terminology Criteria for Adverse Events; PTT, partial thromboplastin time; TGCT, tenosynovial giant cell tumor.

**Table S3.** Serious Hepatic Adverse Reactions in Non-TGCT Patients

| <b>Non-TGCT Cases (study)</b>                                | <b>Pexidartinib Starting Dose (Onset)</b>     | <b>Type of Hepatic Injury<br/>R value<sup>a</sup></b>                                                                                                | <b>Outcome</b>                                                                                           |
|--------------------------------------------------------------|-----------------------------------------------|------------------------------------------------------------------------------------------------------------------------------------------------------|----------------------------------------------------------------------------------------------------------|
| 60-year-old female with breast cancer (I-SPY2)               | 1200 mg/d combined with paclitaxel (Day 18)   | Cholestatic hepatotoxicity w/vanishing bile duct syndrome (cholestasis with duct damage and duct loss; severe steatosis)<br>R value <2 = cholestatic | Liver transplant at 20 months                                                                            |
| 66-year-old female with vaginal melanoma (PLX108-13)         | 1000 mg/d (Day 21)                            | Cholestasis with hyperbilirubinemia<br>R value >5 = hepatocellular                                                                                   | Death in context of progressing melanoma and cachexia 3 months after pexidartinib discontinuation        |
| 58-year-old female with advanced breast cancer (IST3397-001) | 1000 mg/d combined with eribulin (Day 28)     | Cholestasis and vanishing bile duct syndrome<br>R value 2.8 = mixed cholestatic                                                                      | Significant worsening of breast cancer on last PET-CT. Recovered after 5 months                          |
| 61-year-old female with ovarian cancer (PLX108-07)           | 600 mg/d combined with paclitaxel (Day 28)    | Cholestatic hepatotoxicity (bland cholestasis)<br>R value 3 = mixed cholestatic                                                                      | Prolonged case. Last ALP at 28 days after onset still 8 × ULN. Died due to underlying cancer progression |
| 73-year-old female with fallopian tube cancer (PLX108-14)    | 600 mg/d combined with pembrolizumab (Day 28) | Cholestatic hepatotoxicity<br>R value <2 = cholestatic                                                                                               | Progressive fallopian tube cancer. Recovered after 2 months                                              |

<sup>a</sup>R value is at the time of initial event.

Abbreviations: ALP, alkaline phosphatase; d, day; PET-CT, positron emission tomography-computed tomography; R, ratio; TGCT, tenosynovial giant cell tumor; ULN, upper limit of normal.

**Table S4.** Liver test abnormalities meeting criteria for pexidartinib dose modifications

| Clinical Parameter                                     | ENLIVEN<br>Randomized<br>(1000 mg/d) <sup>a</sup><br><i>n</i> = 61 | ENLIVEN<br>Crossover<br>(800 mg/d) <sup>a</sup><br><i>n</i> = 30 | PLX108-01<br>TGCT Cohort<br>(1000 mg/d) <sup>a</sup><br><i>n</i> = 39 | Other Phase 1 <sup>b</sup><br>(600 or<br>800 mg/d) <sup>a</sup><br><i>n</i> = 10 | Total<br><i>N</i> = 140 |
|--------------------------------------------------------|--------------------------------------------------------------------|------------------------------------------------------------------|-----------------------------------------------------------------------|----------------------------------------------------------------------------------|-------------------------|
| <b>Increased ALT and/or AST, <i>n</i> (%)</b>          |                                                                    |                                                                  |                                                                       |                                                                                  |                         |
| >3 to 5 × ULN                                          | 7 (12)                                                             | 4 (13)                                                           | 4 (10)                                                                | 1 (10)                                                                           | 16 (11)                 |
| >5 to 10 × ULN                                         | 9 (15)                                                             | 2 (7)                                                            | 2 (5)                                                                 | 1 (10)                                                                           | 14 (10)                 |
| >10 × ULN                                              | 5 (8)                                                              | 1 (3)                                                            | 3 (8)                                                                 | 1 (10)                                                                           | 10 (7)                  |
| <b>Increased ALP and GGT<sup>c</sup>, <i>n</i> (%)</b> |                                                                    |                                                                  |                                                                       |                                                                                  |                         |
| ALP >2 × ULN                                           | 8 (13)                                                             | 1 (3)                                                            | 4 (10)                                                                | 1 (10)                                                                           | 14 (10)                 |
| ALP >2 × ULN and<br>GGT >2 × ULN <sup>a</sup>          | N/A                                                                | N/A                                                              | N/A                                                                   | 1 (11) <sup>c</sup>                                                              | 1 (11)                  |
| <b>Increased bilirubin, <i>n</i> (%)</b>               |                                                                    |                                                                  |                                                                       |                                                                                  |                         |
| TBIL >ULN to <2 ×<br>ULN                               | 4 (7)                                                              | 1 (3)                                                            | 3 (8)                                                                 | 0                                                                                | 8 (6)                   |
| TBIL >ULN to <2 ×<br>ULN or DBIL >ULN to<br><1.5 × ULN | 6 (10)                                                             | 2 (7)                                                            | 4 (10)                                                                | 0                                                                                | 12 (9)                  |
| TBIL ≥2 × ULN                                          | 3 (5)                                                              | 0                                                                | 2 (5)                                                                 | 1 (10)                                                                           | 6 (4)                   |
| TBIL ≥2 × ULN or<br>DBIL >1.5 × ULN                    | 7 (12)                                                             | 1 (3)                                                            | 6 (15)                                                                | 1 (10)                                                                           | 15 (11)                 |

<sup>a</sup> Pexidartinib starting dose.

<sup>b</sup> Includes one patient with a single timepoint elevation of TBIL considered unrelated to treatment.

<sup>c</sup> GGT was routinely collected only in study 'PL3397-A-U126'. Calculation for ALP >2 × ULN and GGT >2 × ULN in Other Phase 1 Studies is using only U126 TGCT patients (*n* = 9).

Abbreviations: ALP, alkaline phosphatase; ALT, alanine aminotransferase; AST, aspartate aminotransferase; DBIL, direct bilirubin; GGT, gamma glutamyl transferase; TBIL, total bilirubin; TGCT, tenosynovial giant cell tumor; ULN, upper limit of normal.

**Table S5.** Recommended dosage modifications for pexidartinib dependent on adverse reaction [17]

| Adverse Reaction                                    | Severity                                                                | Pexidartinib Dosage Modifications                                                                                                                                                                                                                                                                                                            |
|-----------------------------------------------------|-------------------------------------------------------------------------|----------------------------------------------------------------------------------------------------------------------------------------------------------------------------------------------------------------------------------------------------------------------------------------------------------------------------------------------|
| Hepatotoxicity                                      |                                                                         |                                                                                                                                                                                                                                                                                                                                              |
| Increased ALT and/or AST                            | >3 to 5 × ULN                                                           | <ul style="list-style-type: none"> <li>Withhold and monitor liver tests <u>weekly</u>.</li> <li>If AST and ALT are ≤3 × ULN within 4 weeks, resume at reduced dose.</li> <li>If AST or ALT is <u>not</u> ≤3 × ULN in 4 weeks, permanently discontinue pexidartinib.</li> </ul>                                                               |
|                                                     | >5 to 10 × ULN                                                          | <ul style="list-style-type: none"> <li>Withhold and monitor liver tests <u>twice weekly</u>.</li> <li>If AST and ALT are ≤3 × ULN within 4 weeks, resume at reduced dose.</li> <li>If AST or ALT is <u>not</u> ≤3 × ULN in 4 weeks, permanently discontinue pexidartinib.</li> </ul>                                                         |
|                                                     | >10 × ULN                                                               | <ul style="list-style-type: none"> <li>Permanently discontinue pexidartinib.</li> <li>Monitor liver tests <u>twice weekly</u> until AST or ALT is ≤5 × ULN, then <u>weekly</u> until ≤3 times ULN.</li> </ul>                                                                                                                                |
| Increased ALP <sup>a</sup> and GGT                  | ALP >2 × ULN with GGT >2 × ULN                                          | <ul style="list-style-type: none"> <li>Permanently discontinue pexidartinib. Monitor liver tests <u>twice weekly</u> until ALP is ≤5 × ULN, then <u>weekly</u> until ≤2 × ULN.</li> </ul>                                                                                                                                                    |
| Increased bilirubin                                 | TBIL greater than ULN to less than 2 × ULN or DBIL > ULN and <1.5 × ULN | <ul style="list-style-type: none"> <li>Withhold and monitor liver tests <u>twice weekly</u>.</li> <li>If an alternate cause for increased bilirubin is confirmed and bilirubin is &lt; ULN within 4 weeks, resume at reduced dose.</li> <li>If bilirubin is <u>not</u> &lt; ULN in 4 weeks, permanently discontinue pexidartinib.</li> </ul> |
|                                                     | TBIL ≥2 × ULN or DBIL >1.5 × ULN                                        | <ul style="list-style-type: none"> <li>Permanently discontinue pexidartinib.</li> <li>Monitor liver tests <u>twice weekly</u> until bilirubin is ≤ ULN.</li> </ul>                                                                                                                                                                           |
| Adverse Reactions or Other Laboratory Abnormalities |                                                                         |                                                                                                                                                                                                                                                                                                                                              |
| Any                                                 | Severe or intolerable                                                   | <ul style="list-style-type: none"> <li>Withhold until improvement or resolution.</li> <li>Resume at a reduced dose upon improvement or resolution.</li> </ul>                                                                                                                                                                                |

<sup>a</sup> Confirm ALP elevations as liver isozyme fraction.

Abbreviations: ALT, alanine aminotransferase; ALP, alkaline phosphatase; AST, aspartate aminotransferase; DBIL, direct bilirubin; GGT, gamma-glutamyl transferase; TBIL, total bilirubin; ULN, upper limit of normal.
